# Supplementary material for: Inversion of axial chirality in coordinated bis-β-diketonato ligands
Source: Royal Society of Chemistry journal article supplement (doi:10.1039/c2dt31746j), 2012-10-04
Supplement: c2dt31746j.pdf [file c2dt31746j.pdf]

# Supporting Information for

## Inversion of Axial Chirality in Coordinated Bis- $\beta$ -diketonato Ligands

Hisako Sato,<sup>a\*</sup> Yukie Mori,<sup>b</sup> Takafumi Kitazawa<sup>c</sup> and Akihiko Yamagishi<sup>c</sup>

<sup>a</sup> *Graduated School of Science and Engineering, Ehime University, Matsuyama, Ehime 790-8577, Japan. Fax: +81-89-927-9599; Tel: +81-89-927-9590; E-mail: sato.hisako.my@ehime-u.ac.jp*

<sup>b</sup> *Faculty of Science, Ochanomizu University, Tokyo, 112-8610, Japan*

<sup>c</sup> *Department of Chemistry, Toho University, Funabashi, Chiba 274-8510, Japan .*

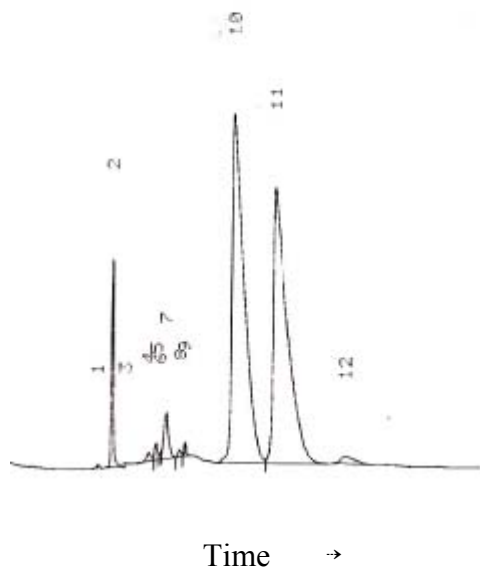

Figure S1. The HPLC chromatogram for the fraction containing  $[\text{Ru}(\text{acac})_2(\text{baetH})]$ . The mixture was eluted on a silica gel column (Inertsil, GL Science Inc., (Japan)) with a solvent of 95:5 (v/v) benzene-acetonitrile at a flow rate of 1.0 ml/min. The absorbance of the eluate was monitored at 600 nm. Peaks  $F_{10}$  at 9.8 min and  $F_{11}$  at 10.5 min (as denoted in the figure) were assigned to the two diastereomers (see text). The other small peaks were impurities.

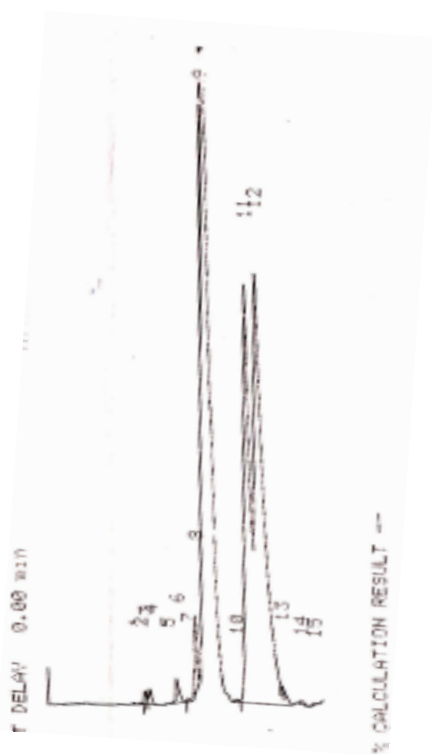

Figure S2. The HPLC chromatogram for the fraction containing  $[\text{Ru}(\text{acac})_2(\text{baet})\text{Ru}(\text{acac})_2]$ . The mixture was eluted on a silica gel column (Inertsil, GL Science Inc. (Japan)) with a solvent of 8:2 (v/v) benzene-acetonitrile at a flow rate of 0.5 ml/min. The absorbance of the eluate was monitored at 600 nm. Peaks  $F_9$  at 27.4 min,  $F_{11}$  at 34.9 min and  $F_{12}$  at 36.7 min (as denoted in the figure) were assigned to the meso-type, a racemic and the other racemic dinuclear complexes, respectively (see text).

## The $^1\text{H}$ NMR spectra (400 MHz, $\text{CDCl}_3$ ) and mass analyses of free ligands and fractions $\text{B}_{11}$ , $\text{B}_{12}$ , $\text{B}_{31}$ , $\text{B}_{32}$ and $\text{B}_{33}$ .

### dabeH<sub>2</sub> as HL-LH

**dabeH<sub>2</sub>**:  $\delta = 2.0$  (s, 6H, CH<sub>3</sub>), 5.9 (s, 2H, CH), 7.0–8.0 (m, 10H, arom.);  $m/z = 322$  (calc. 322).

**B<sub>11</sub>**:  $[\text{Ru}(\text{acac})_2(\text{dabeH})]$ .  $\delta = -12.18$  (3H, CH<sub>3</sub>),  $-10.88$  (3H, CH<sub>3</sub>),  $-8.69$  (3H, CH<sub>3</sub>),  $1.19$  (3H, CH<sub>3</sub>),  $1.31$  (3H, CH<sub>3</sub>),  $3.95$  (3H, CH<sub>3</sub>),  $4.55$  (2H, arom.),  $5.49$  (2H, arom.),  $6.34$  (1H, arom.),  $6.65$  (2H, arom.),  $9.03$  (1H, arom.),  $9.98$  (2H, arom.),  $15.66$  (1H, OH);  $m/z = 620$  (calc. for  $^{102}\text{Ru}$ : 621).

**B<sub>12</sub>**:  $[\text{Ru}(\text{acac})_2(\text{dabeH})]$ .  $\delta = -10.48$  (3H, CH<sub>3</sub>),  $-8.85$  (3H, CH<sub>3</sub>),  $-5.87$  (3H, CH<sub>3</sub>),  $-2.07$  (3H, CH<sub>3</sub>),  $0.71$  (3H, CH<sub>3</sub>),  $0.77$  (3H, CH<sub>3</sub>),  $4.65$  (2H, arom.),  $5.77$  (2H, arom.),  $6.23$  (1H, arom.),  $6.74$  (2H, arom.),  $8.91$  (1H, arom.),  $9.64$  (2H, arom.),  $15.49$  (1H OH);  $m/z = 620$  (calc. for  $^{102}\text{Ru}$ : 621).

**B<sub>31</sub>**:  $\Delta\Lambda$ - $[\text{Ru}(\text{acac})_2(\text{dabe})\text{Ru}(\text{acac})_2]$ .  $\delta = -34.20$  (2H, CH),  $-17.61$  (2H, CH),  $-14.30$  (3H, CH<sub>3</sub>),  $-12.70$  (3H, CH<sub>3</sub>),  $-11.59$  (3H, CH<sub>3</sub>),  $-11.03$  (3H, CH<sub>3</sub>),  $-9.70$  (3H, CH<sub>3</sub>),  $-6.52$  (3H, CH<sub>3</sub>),  $0.12$  (3H, CH<sub>3</sub>),  $2.28$  (3H, CH<sub>3</sub>),  $3.77$  (3H, CH<sub>3</sub>),  $4.52$  (2H, arom.),  $4.67$  (2H, arom.),  $5.47$  (3H, CH<sub>3</sub>),  $8.02$  (2H, arom.),  $8.34$  (4H, arom.);  $m/z = 918$  (calc. for  $^{102}\text{Ru}$ : 920).

**B<sub>32</sub>**:  $\Delta\Delta$ - (or  $\Lambda\Lambda$ )- $[\text{Ru}(\text{acac})_2(\text{dabe})\text{Ru}(\text{acac})_2]$ .  $\delta = -35.10$  (2H, CH),  $-16.10$  (2H, CH),  $-15.3$  (6H, CH<sub>3</sub>),  $-10.13$  (6H, CH<sub>3</sub>),  $-6.90$  (6H, CH<sub>3</sub>),  $0.77$  (6H, CH<sub>3</sub>),  $4.01$  (4H, arom.),  $4.70$  (6H, CH<sub>3</sub>),  $6.26$  (4H, arom.),  $7.58$  (2H, arom.);  $m/z = 918$  (calc. for  $^{102}\text{Ru}$ : 920).

**B<sub>33</sub>**:  $\Delta\Delta$ - (or  $\Lambda\Lambda$ )- $[\text{Ru}(\text{acac})_2(\text{dabe})\text{Ru}(\text{acac})_2]$ .  $\delta = < -40$  (2H, CH),  $-13.81$  (6H, CH<sub>3</sub>),  $-12.86$  (6H, CH<sub>3</sub>),  $-10.00$  (2H, CH),  $-9.31$  (6H, CH<sub>3</sub>),  $3.37$  (6H, CH<sub>3</sub>),  $4.13$  (4H, arom.),  $6.65$  (6H, CH<sub>3</sub>),  $7.89$  (2H, arom.),  $8.92$  (4H, arom.);  $m/z = 918$  (calc. for  $^{102}\text{Ru}$ : 920).

### baetH<sub>2</sub> as HL-LH

**baetH<sub>2</sub>**:  $\delta = 0.91$  (d, 12H, CH<sub>3</sub>), 1.98 (s, 6H, COCH<sub>3</sub>), 2.11 (d, 4H, CH<sub>2</sub>), 2.1–2.2 (m, 2H, CH), 17.05 (s, 2H, OH);  $m/z = 282$  (calc. 282).

**B<sub>11</sub>**:  $[\text{Ru}(\text{acac})_2(\text{baetH})]$ .  $\delta = -33.7$  (1H, CH),  $-23.3$  (1H, CH),  $-12.40$  (1H, COCH<sub>2</sub>),  $-10.92$  (1H, COCH<sub>2</sub>),  $-10.36$  (3H, CH<sub>3</sub>),  $-9.86$  (3H, CH<sub>3</sub>),  $-5.59$  (3H, CH<sub>3</sub>),  $-2.96$  (3H, CH<sub>3</sub>),  $-0.32$  (3H, CH<sub>3</sub>),  $0.34$  (3H, CH(CH<sub>3</sub>)<sub>2</sub>),  $0.46$  (3H, CH(CH<sub>3</sub>)<sub>2</sub>),  $0.85$  (3H, CH(CH<sub>3</sub>)<sub>2</sub>),  $1.75$  (3H, CH(CH<sub>3</sub>)<sub>2</sub>),  $2.1$  (1H, CHMe<sub>2</sub>),  $2.40$  (3H, COCH<sub>3</sub>),  $2.45$  (2H, COCH<sub>2</sub>),  $9.68$  (1H, CHMe<sub>2</sub>),  $15.66$  (1H, OH);  $m/z = 580$  (calc. for  $^{102}\text{Ru}$ : 581).

**B<sub>12</sub>**:  $[\text{Ru}(\text{acac})_2(\text{baetH})]$ .  $\delta = -32.6$  (1H, CH),  $-22.6$  (1H, CH),  $-11.32$  (1H, COCH<sub>2</sub>),  $-10.72$  (3H, CH<sub>3</sub>),  $-10.08$  (1H, COCH<sub>2</sub>),  $-9.34$  (3H, CH<sub>3</sub>),  $-4.48$  (3H, CH<sub>3</sub>),  $-2.90$  (3H, CH<sub>3</sub>),  $-1.16$  (3H, CH<sub>3</sub>),  $-0.32$  (d, 3H, CH(CH<sub>3</sub>)<sub>2</sub>),  $0.60$  (d, 3H, CH(CH<sub>3</sub>)<sub>2</sub>),  $1.14$  (d, 3H, CH(CH<sub>3</sub>)<sub>2</sub>),  $1.20$  (d, 3H, CH(CH<sub>3</sub>)<sub>2</sub>),  $1.20$  (3H, COCH<sub>3</sub>),  $1.57$  (2H, COCH<sub>2</sub>),  $8.36$  (1H, CHMe<sub>2</sub>),  $15.47$  (1H, OH);  $m/z = 580$  (calc. for  $^{102}\text{Ru}$ : 581).

**B<sub>31</sub>**:  $\Delta\Lambda$ - $[\text{Ru}(\text{acac})_2(\text{baet})\text{Ru}(\text{acac})_2]$ .  $\delta = -29.8$  (1H, CH),  $-28.5$  (1H, CH),  $-22.7$  (1H, CH),  $-22.1$  (1H, CH),  $-19.59$  (1H, COCH<sub>2</sub>),  $-18.29$  (1H, COCH<sub>2</sub>),  $-15.67$  (1H, COCH<sub>2</sub>),  $-14.96$  (1H, COCH<sub>2</sub>),  $-13.73$  (3H),  $-13.01$  (3H),  $-7.88$  (3H),  $-7.37$  (3H),  $-3.87$  (3H),  $-3.46$  (3H),  $-2.84$  (3H),  $-2.83$  (3H),  $-1.07$  (3H),  $-0.62$  (3H),  $0.08$  (3H),  $0.44$  (3H),  $0.93$  (3H),  $0.94$  (3H),  $9.67$  (2H);  $m/z = 879$  (calc. for  $^{102}\text{Ru}$ : 880).

**B<sub>32</sub>**:  $\Delta\Delta$ - (or  $\Lambda\Lambda$ ) -[Ru(acac)<sub>2</sub>(baet)Ru(acac)<sub>2</sub>].  $\delta$  = -28.3 (2H, CH), -24.4 (2H, CH), -16.91 (2H, COCH<sub>2</sub>), -16.44 (2H, COCH<sub>2</sub>), -13.07 (6H), -7.27 (6H), -3.95 (6H), -3.02 (6H), -1.09 (6H), -0.63 (6H), 1.59 (6H), 10.05 (2H, CHMe<sub>2</sub>);  $m/z$  = 879 (calc. for <sup>102</sup>Ru: 880).

**B<sub>33</sub>**:  $\Delta\Delta$ - (or  $\Lambda\Lambda$ ) -[Ru(acac)<sub>2</sub>(baet)Ru(acac)<sub>2</sub>].  $\delta$  = -31.9 (2H, CH), -20.2 (2H, CH), -15.16 (2H, COCH<sub>2</sub>), -14.73 (2H, COCH<sub>2</sub>), -11.85 (6H), -8.37 (6H), -5.08 (6H), -2.93 (6H), -1.81 (6H), 1.53 (12H), 7.37 (2H, CHMe<sub>2</sub>);  $m/z$  = 879 (calc. for <sup>102</sup>Ru: 880).

#### dpeH<sub>2</sub> as HL-LH

**dpeH<sub>2</sub>**:  $\delta$  = 1.12 (t, 6H, CH<sub>3</sub>), 2.01 (s, 6H, COCH<sub>3</sub>), 2.30 (q, 4H, CH<sub>2</sub>), 16.87 (s, 2H, OH);  $m/z$  = 226 (calc. 226).

**B<sub>11</sub>**: [Ru(acac)<sub>2</sub>(dpeH)].  $\delta$  = -12.57 (1H, COCH<sub>2</sub>), -10.78 (3H, CH<sub>3</sub>), -9.95 (3H, CH<sub>3</sub>), -8.48 (1H, COCH<sub>2</sub>), -6.43 (3H, CH<sub>3</sub>), -3.31 (3H, CH<sub>3</sub>), 0.68 (3H, CH<sub>3</sub>), 2.37 (3H), 3.58 (2H, CH<sub>2</sub>), 16.01 (1H, OH). Some signals in 1.0-1.8 ppm were obscured due to overlap with the signal of residual water in the solvent;  $m/z$  = 524 (calc. for <sup>102</sup>Ru: 525).

**B<sub>12</sub>**: [Ru(acac)<sub>2</sub>(dpeH)].  $\delta$  = -12.46 (3H, CH<sub>3</sub>), -9.85 (3H, CH<sub>3</sub>), -8.41 (1H, COCH<sub>2</sub>), -8.05 (3H, CH<sub>3</sub>), -5.44 (1H, COCH<sub>2</sub>), -1.56 (3H, CH<sub>3</sub>), 1.89 (3H), 3.90 (2H, CH<sub>2</sub>), 16.08 (1H, OH). Some signals in 1.0-1.8 ppm were obscured due to overlap with the signal of residual water in the solvent;  $m/z$  = 524 (calc. for <sup>102</sup>Ru: 525).

**B<sub>31</sub>**:  $\Delta\Delta$ -[Ru(acac)<sub>2</sub>(dpe)Ru(acac)<sub>2</sub>].  $\delta$  = -12.07 (3H, CH<sub>3</sub>), -11.40 (3H, CH<sub>3</sub>), -11.02 (2H, COCH<sub>2</sub>), -10.95 (3H, CH<sub>3</sub>), -10.23 (2H, COCH<sub>2</sub>), -8.95 (3H, CH<sub>3</sub>), -7.29 (3H, CH<sub>3</sub>), -5.00 (3H, CH<sub>3</sub>), -2.81 (3H, CH<sub>3</sub>), -0.47 (3H, CH<sub>3</sub>), 0.59 (3H, CH<sub>3</sub>), 2.72 (3H, CH<sub>3</sub>), 3.69 (3H, CH<sub>3</sub>), 4.41 (3H, CH<sub>3</sub>);  $m/z$  = 822 (calc. for <sup>102</sup>Ru: 824).

**B<sub>32</sub>**:  $\Delta\Delta$ - (or  $\Lambda\Lambda$ ) -[Ru(acac)<sub>2</sub>(dpe)Ru(acac)<sub>2</sub>].  $\delta$  = -11.51 (12H, CH<sub>3</sub>), -11.16 (2H, COCH<sub>2</sub>), -10.19 (2H, COCH<sub>2</sub>), -7.31 (6H, CH<sub>3</sub>), -0.99 (6H, CH<sub>3</sub>), 2.40 (6H, CH<sub>3</sub>), 4.01 (6H, CH<sub>3</sub>);  $m/z$  = 822 (calc. for <sup>102</sup>Ru : 824).

**B<sub>33</sub>**:  $\Delta\Delta$ - (or  $\Lambda\Lambda$ ) -[Ru(acac)<sub>2</sub>(dpe)Ru(acac)<sub>2</sub>].  $\delta$  = -11.66 (4H, COCH<sub>2</sub>), -10.46 (6H, CH<sub>3</sub>), -9.70 (6H, CH<sub>3</sub>), -5.53 (6H, CH<sub>3</sub>), -2.78 (6H, CH<sub>3</sub>), 0.50 (6H, CH<sub>3</sub>), 3.07 (6H, CH<sub>3</sub>);  $m/z$  = 822 (calc. for <sup>102</sup>Ru: 824).

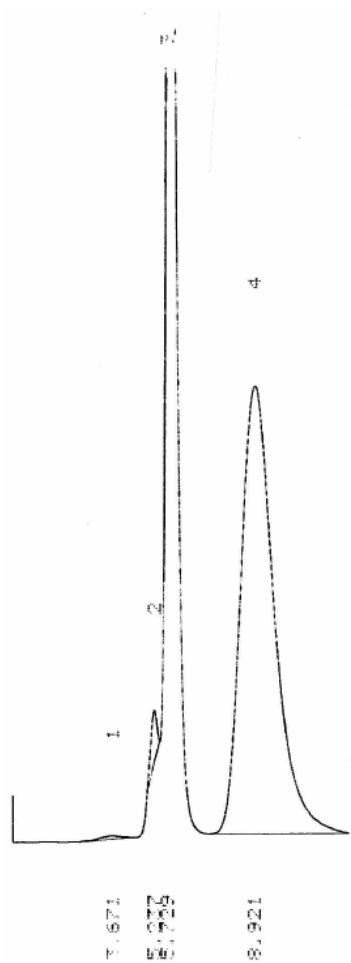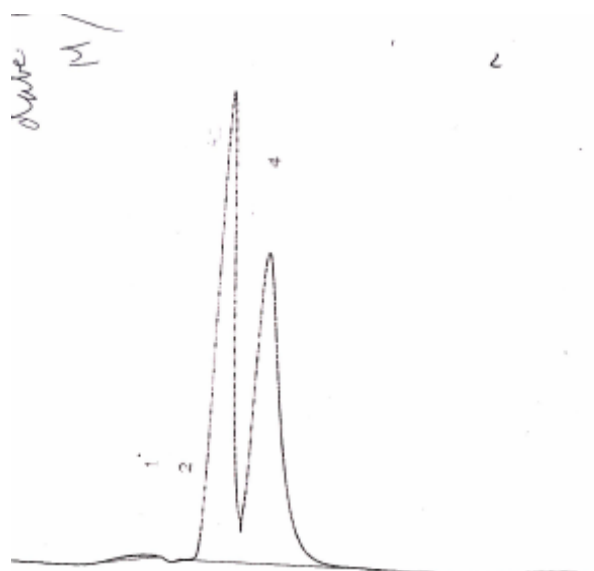

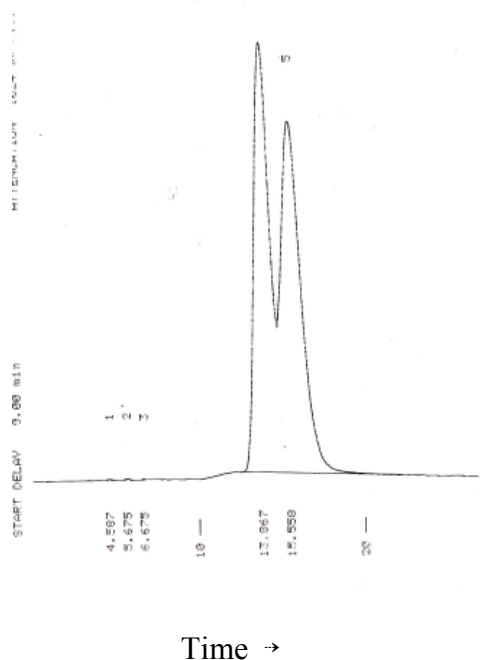

Figure S3. The HPLC chromatograms for  $\Delta\Delta$ -[Ru(acac)<sub>2</sub>(dabe)Ru(acac)<sub>2</sub>] (top),  $\Delta\Delta$ -[Ru(acac)<sub>2</sub>(baet)Ru(acac)<sub>2</sub>] (middle) and  $\Delta\Delta$ -[Ru(acac)<sub>2</sub>(dpe)Ru(acac)<sub>2</sub>] (bottom). Each racemate was eluted on a chiral column (4 mm (i.d.)  $\times$  25 cm) packed with an ion-exchange adduct of  $\Delta$ -[Ru(phen)<sub>3</sub>]<sup>2+</sup> (phen = 1,10-phenanthroline) and synthetic hectorite at a flow rate of 0.5 ml/min. The eluting solvent was a mixture of methanol and chloroform. The absorbance of the eluate was monitored at 600 nm.

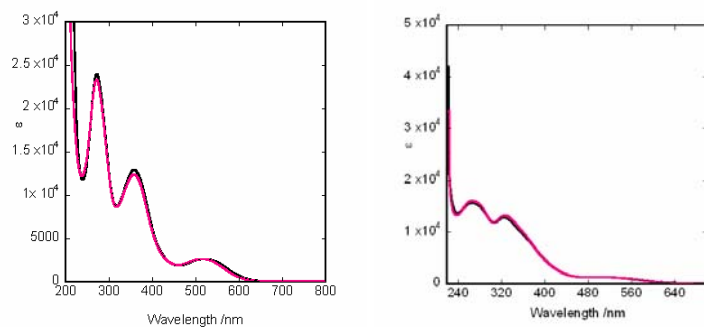

Figure S4. (left) The electronic spectra of methanol solutions of  $\Delta\Delta$ -[Ru(acac)<sub>2</sub>(baet)Ru(acac)<sub>2</sub>] (black line) and  $\Delta\Delta$ -[Ru(acac)<sub>2</sub>(dpe)Ru(acac)<sub>2</sub>] (red line).

(right) The electronic spectra of methanol solutions of the two diastereomers of [Ru(acac)<sub>2</sub>(dabeH)], **B**<sub>11</sub> (red line) and **B**<sub>12</sub> (black line).

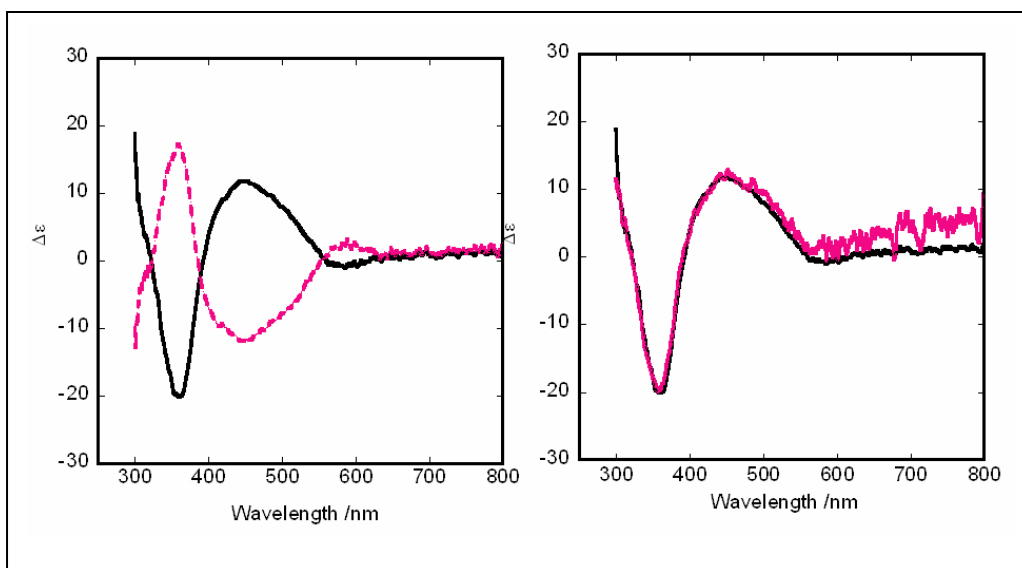

Figure S5. (left) The ECD spectra of methanol/chloroform solutions of the first (black) and the second (red) fractions when the diastereomer of  $[\text{Ru}(\text{acac})_2(\text{dabeH})]$  ( $\mathbf{B}_{12}$ ) was eluted on the chiral column;

(right) The ECD spectrum of a methanol solution of the first fraction when the diastereomer of  $[\text{Ru}(\text{acac})_2(\text{dabeH})]$ ,  $\mathbf{B}_{11}$ , was eluted on the chiral column (red). For comparison, the ECD spectrum of the first fraction for  $\mathbf{B}_{12}$  is also included (black).

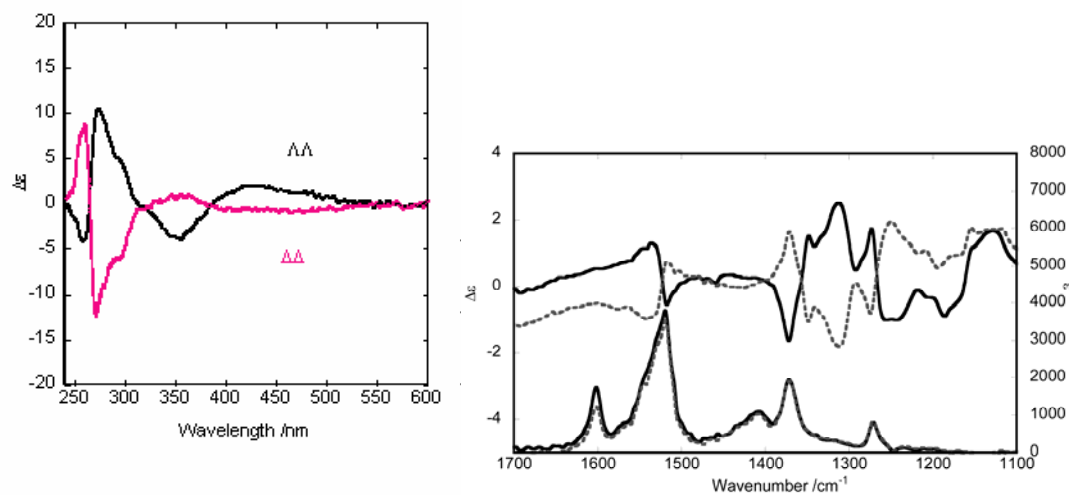

Figure S6. The ECD (left) and VCD (right) spectra of  $\Delta\Delta$ - (dotted line) or  $\Lambda\Lambda$ - (solid line)  $[\text{Ru}(\text{acac})_2(\text{baet})\text{Ru}(\text{acac})_2]$ .



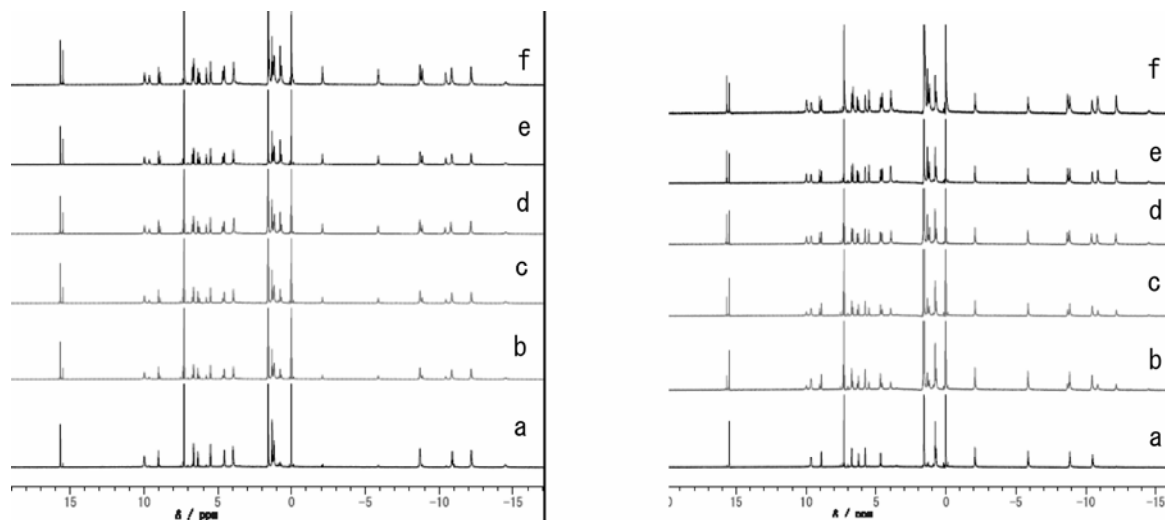

Figure S7. The change of the  $^1\text{H}$  NMR spectra of the two diastereomers of  $[\text{Ru}(\text{acac})_2(\text{dabeH})]$  with time. The reactions started from  $\text{B}_{11}$  (left) and  $\text{B}_{12}$  (right), respectively; (a) 0, (b) 2, (c) 5, (d) 8, (e) 16 and (f) 25 hours. The solvents were  $\text{CDCl}_3$ .

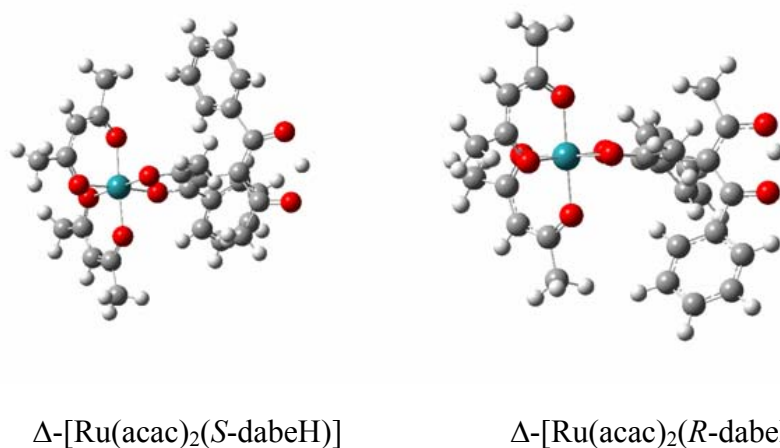

Figure S8. The optimized structures of  $\Delta$ - $[\text{Ru}(\text{acac})_2(\text{S-dabeH})]$  (left) and  $\Delta$ - $[\text{Ru}(\text{acac})_2(\text{R-dabeH})]$  (right) by the DFT calculation (see text). The total energy of each diastereomer is calculated as below:

| diastereomer                                            | Total Energy (a.u.) |
|---------------------------------------------------------|---------------------|
| $\Delta$ - $[\text{Ru}(\text{acac})_2(\text{S-dabeH})]$ | -1858.67319667      |
| $\Delta$ - $[\text{Ru}(\text{acac})_2(\text{R-dabeH})]$ | -1858.67459518      |
